# Supplementary material for: Arachidonic Acid Metabolism Controls Macrophage Alternative Activation Through Regulating Oxidative Phosphorylation in PPARγ Dependent Manner
Source: PubMed Central journal article supplement (PMC8211451; doi:10.3389/fimmu.2021.618501), 2021-06-03
Supplement: DataSheet_1.pdf [file DataSheet_1.pdf]

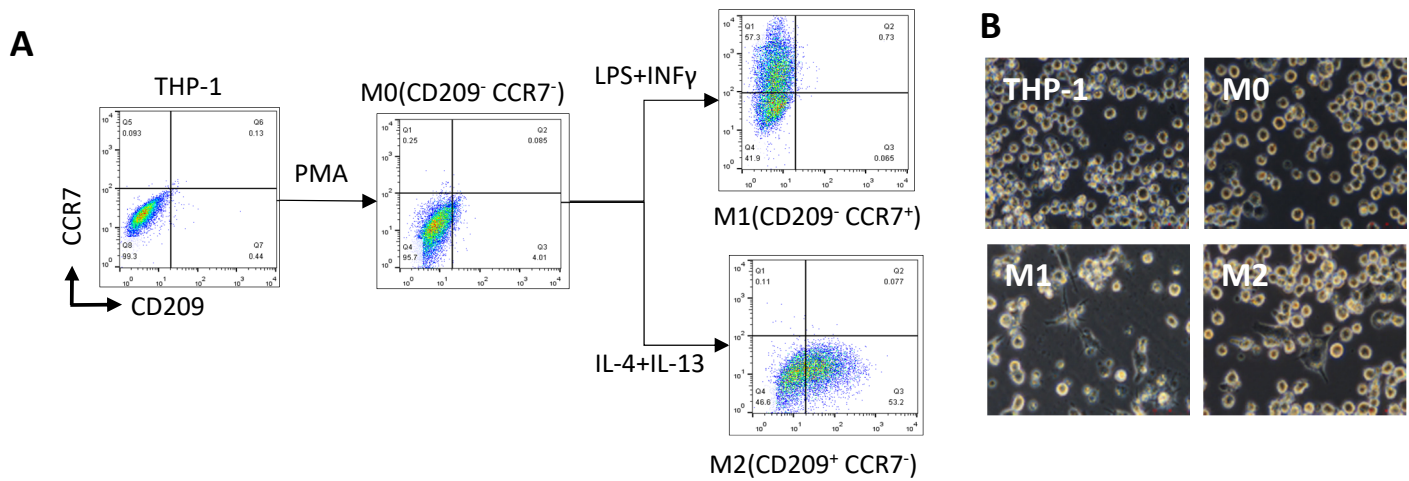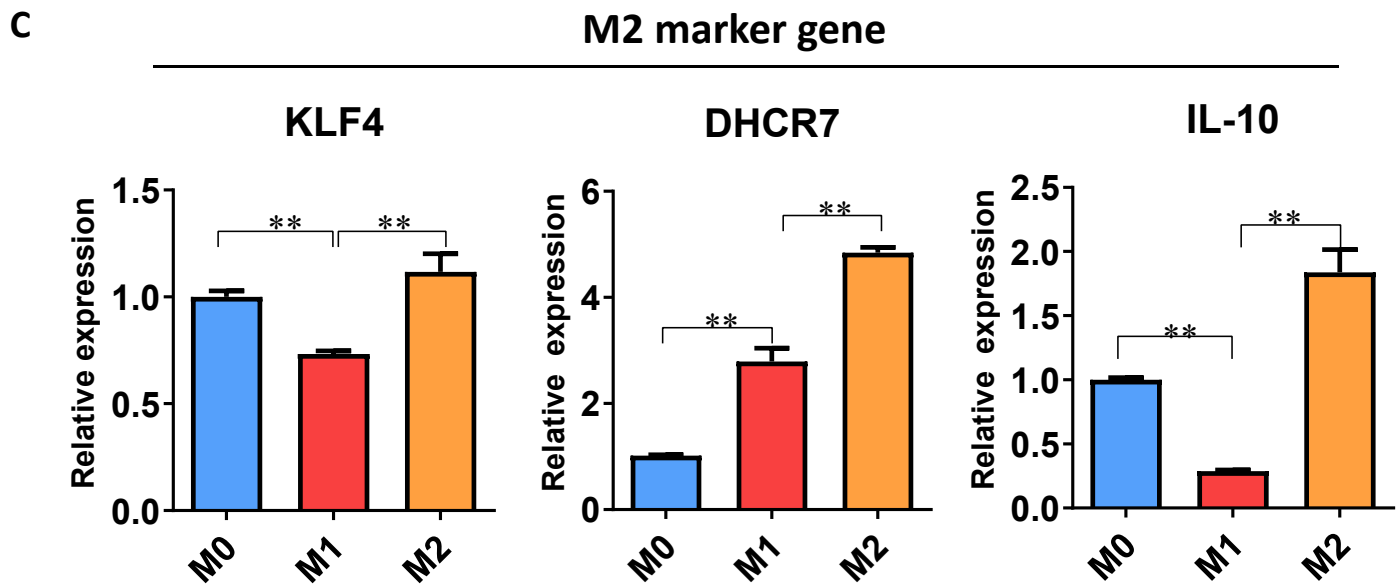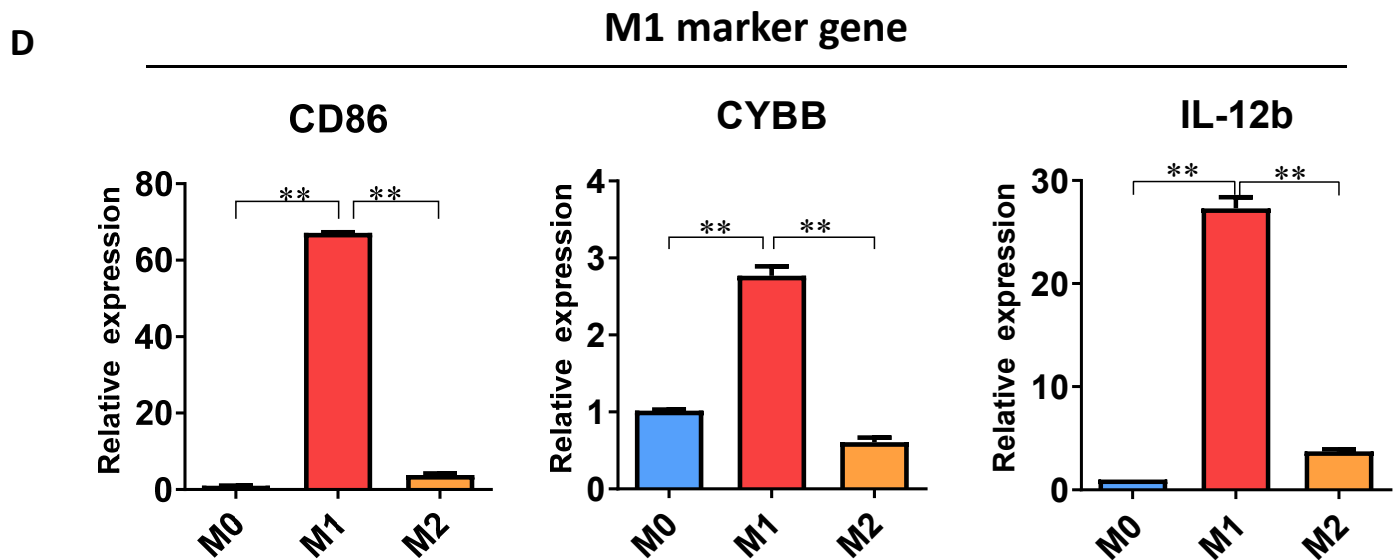

**Supplementary Figure S1.** Characteristics of THP-1 derived M1/M2. (A) Surface marker (CCR7+CD209) detected by flow cytometry distinguished M1/M2. (B) Morphology alteration during differentiation and polarization. (C and D) qRT-PCR detected M2 or M1 macrophages markers. All data represent mean  $\pm$  S.D. (n=3). \*P < 0.05; \*\* P < 0.01.

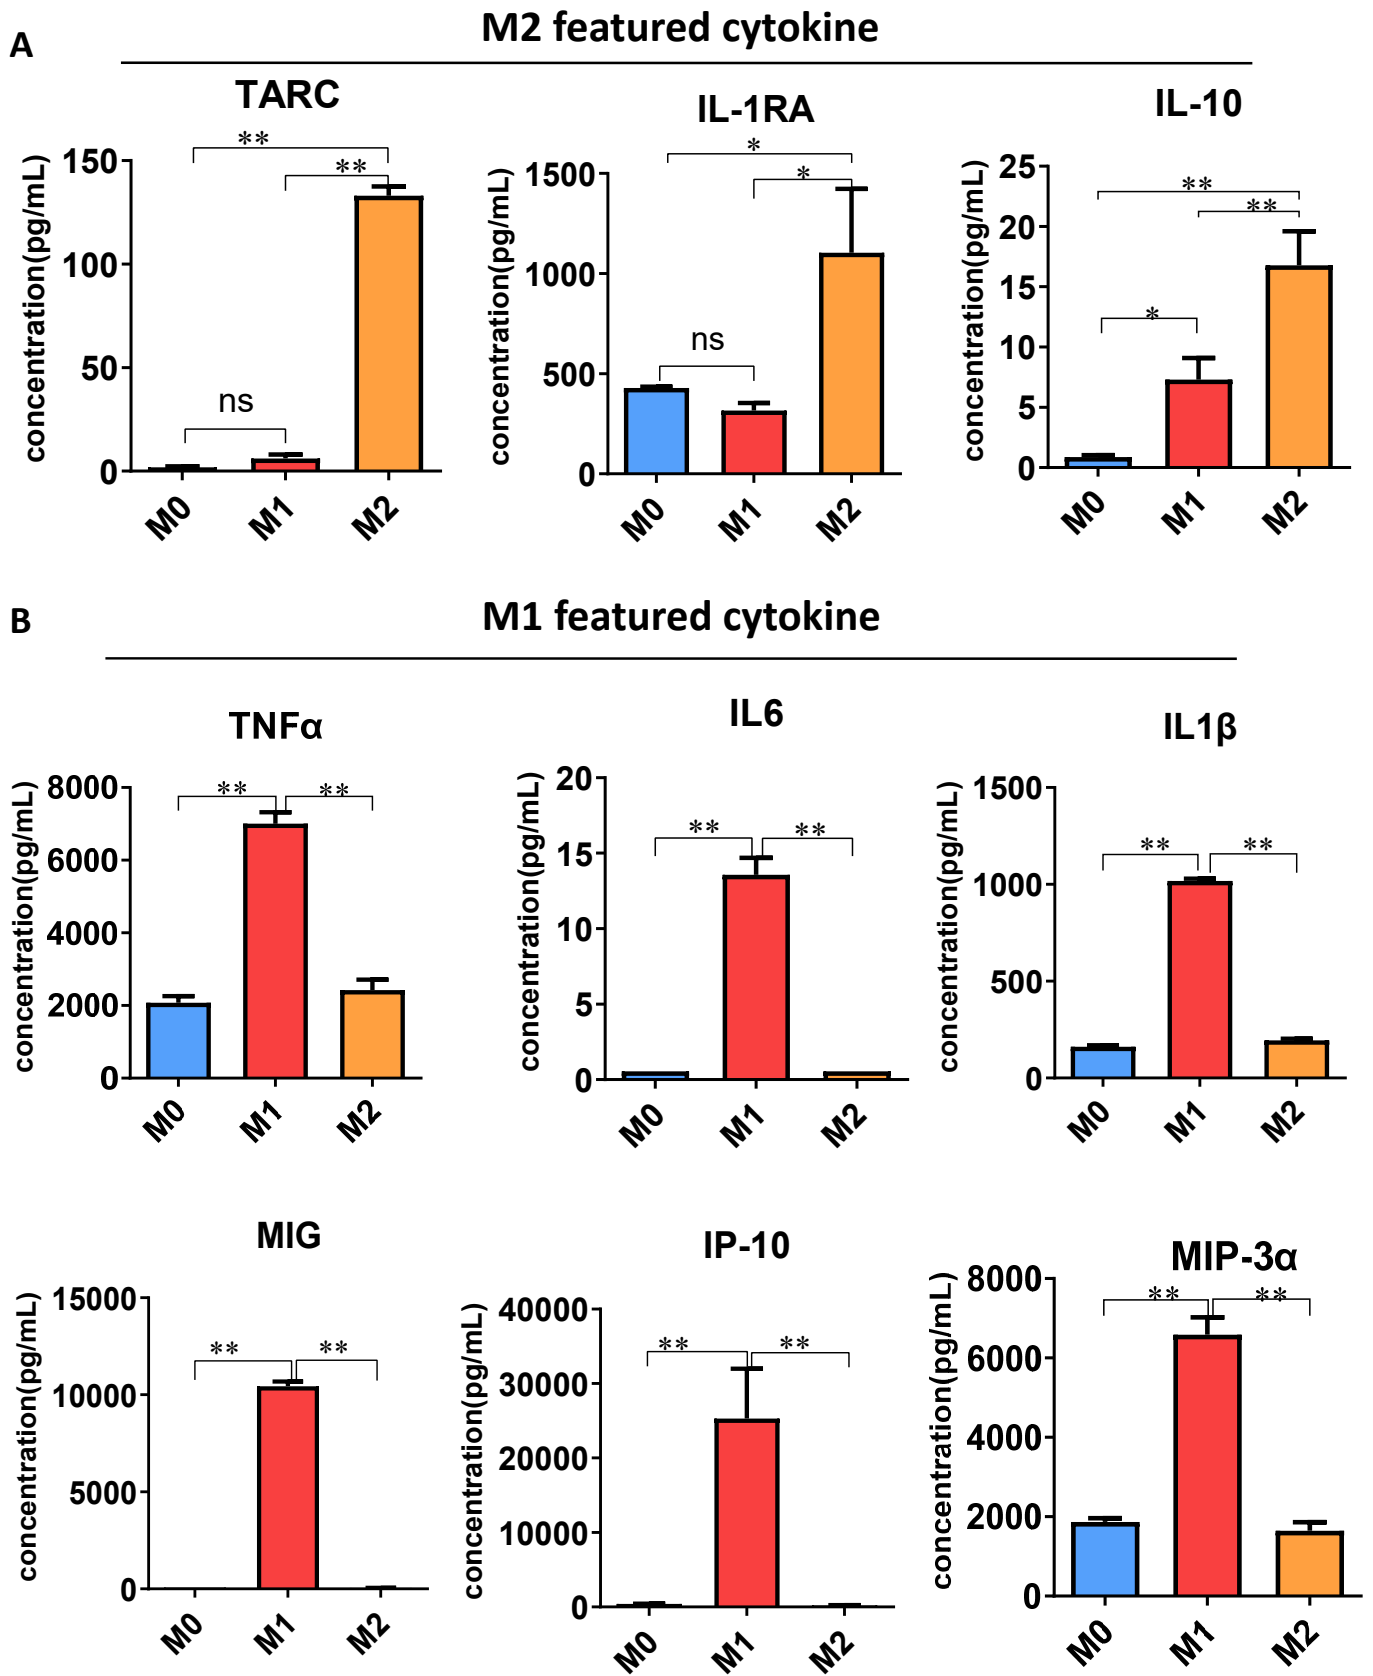

**Supplementary Figure S2.** Functional cytokines of THP-1 derived M1/M2. (A and B) cytokines level of M2 (A) or M1 (B) detected by legendplex panel. All data represent mean  $\pm$  S.D. (n=3). \*P < 0.05; \*\* P < 0.01; ns, no significance.

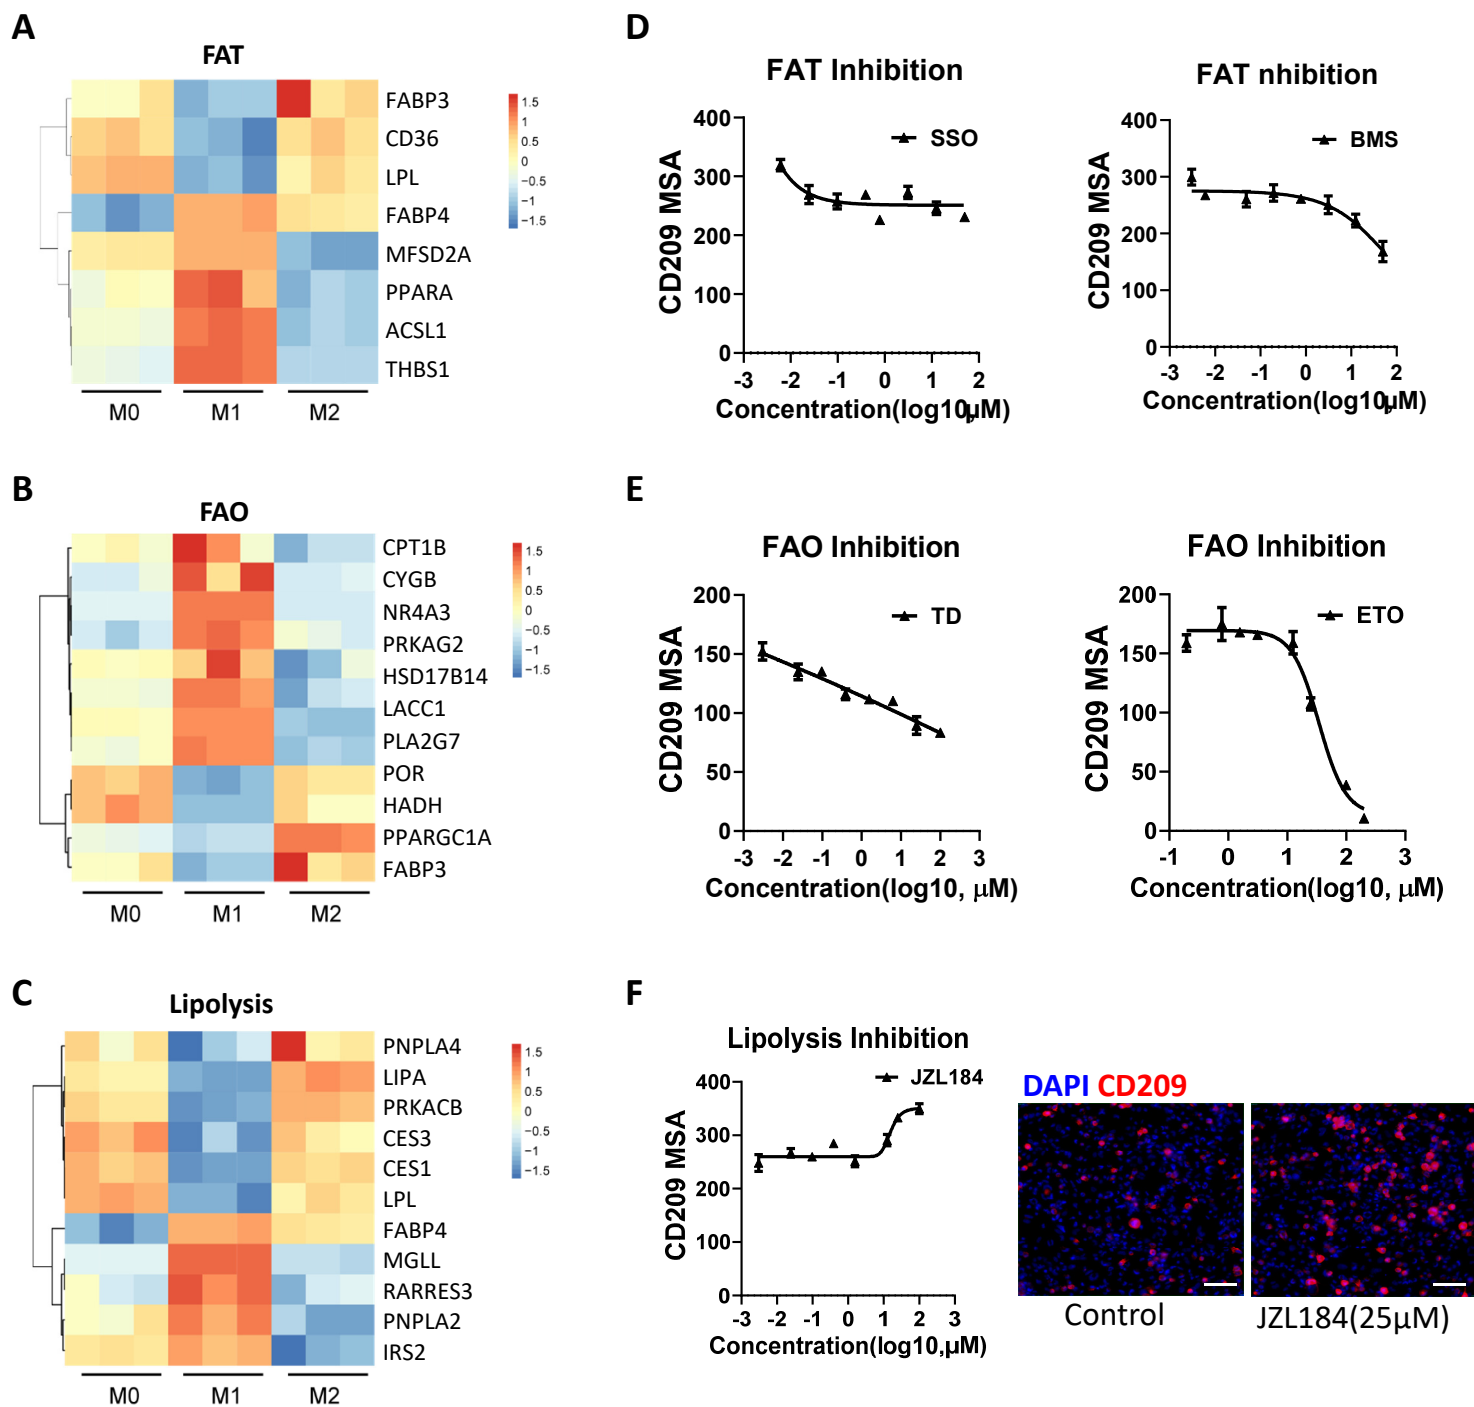

**Supplementary Figure S3.** Lipid metabolism closely correlates to macrophage polarization. (A-C) Heatmaps of differentially expressed gene in THP-1 derived macrophages related to fatty acids transport (FAT), fatty acid oxidation (FAO), lipolysis, respectively. (D-F) Dose response curves of CD209 expression in THP-1 derived M2 macrophages with inhibitors treated as indicated. All data represent mean  $\pm$  S.D. (n=3). MSA. mean stain area. Right panel of (F): representative images, scale bar: 100  $\mu$ m.

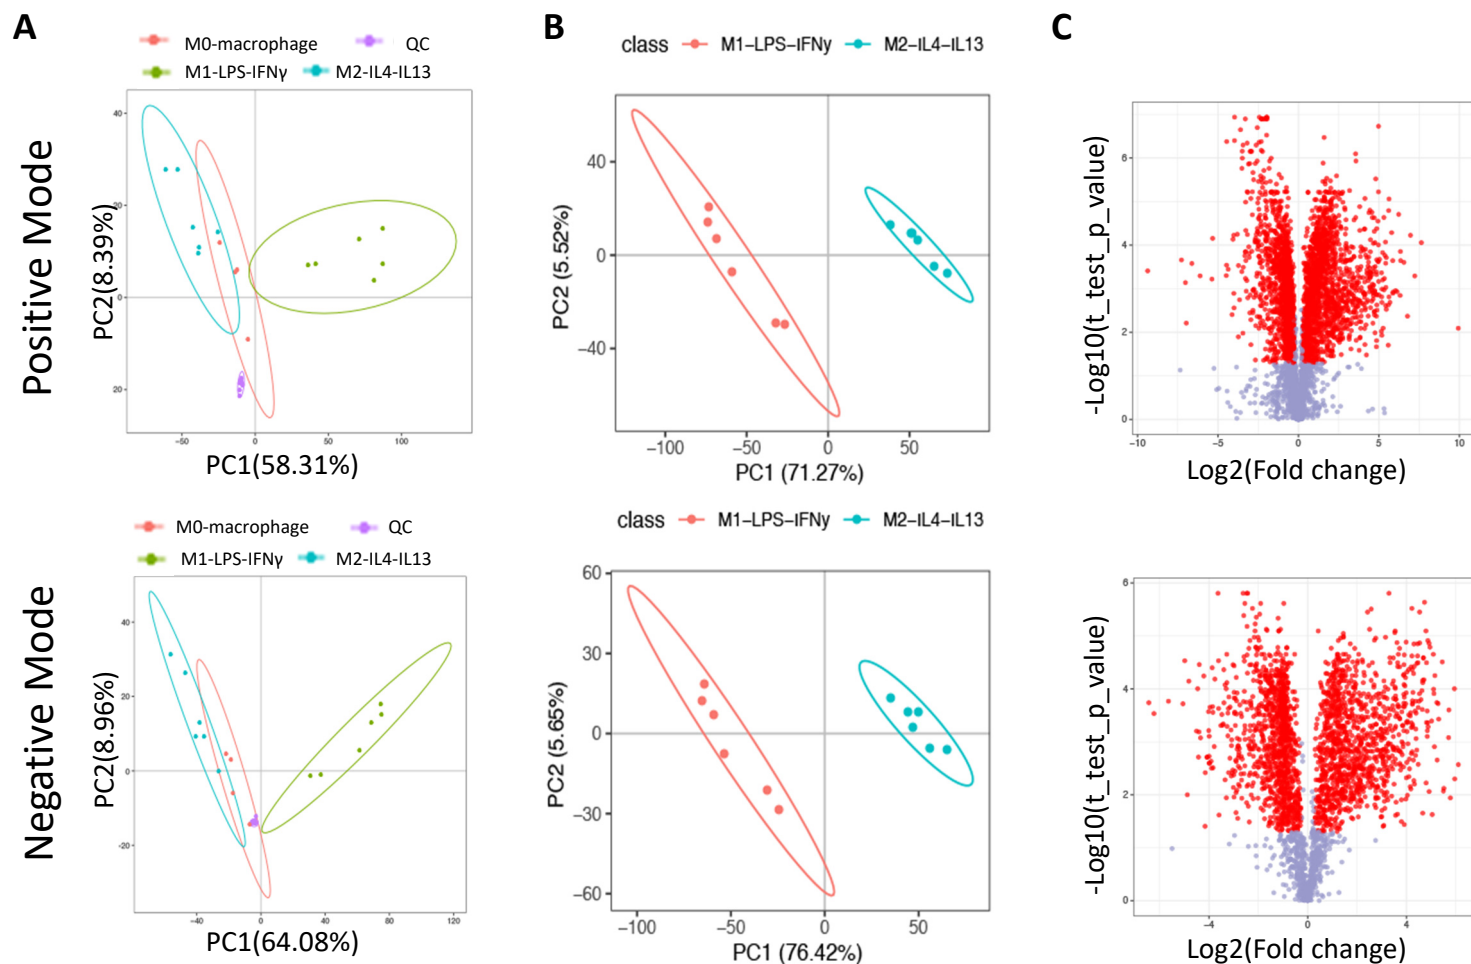

**Supplementary Figure S4.** Distinct lipidomics characteristics of M1/M2 macrophages. **(A)** Principal components analysis of metabolites from positive or negative ion mode. Quality control samples QC indicated a good quality of the collected data. Each point represents a sample. **(B)** Partial least squares-discriminant analysis revealed distinct metabolites profile of M1/M2 macrophages. **(C)** Overall differential metabolites of M1/M2 macrophages. Fold change  $\geq 1.2$  or  $\leq 0.83$  and q-value  $< 0.05$  were set as screening standards. Red: differential metabolites; grey: metabolites without difference.

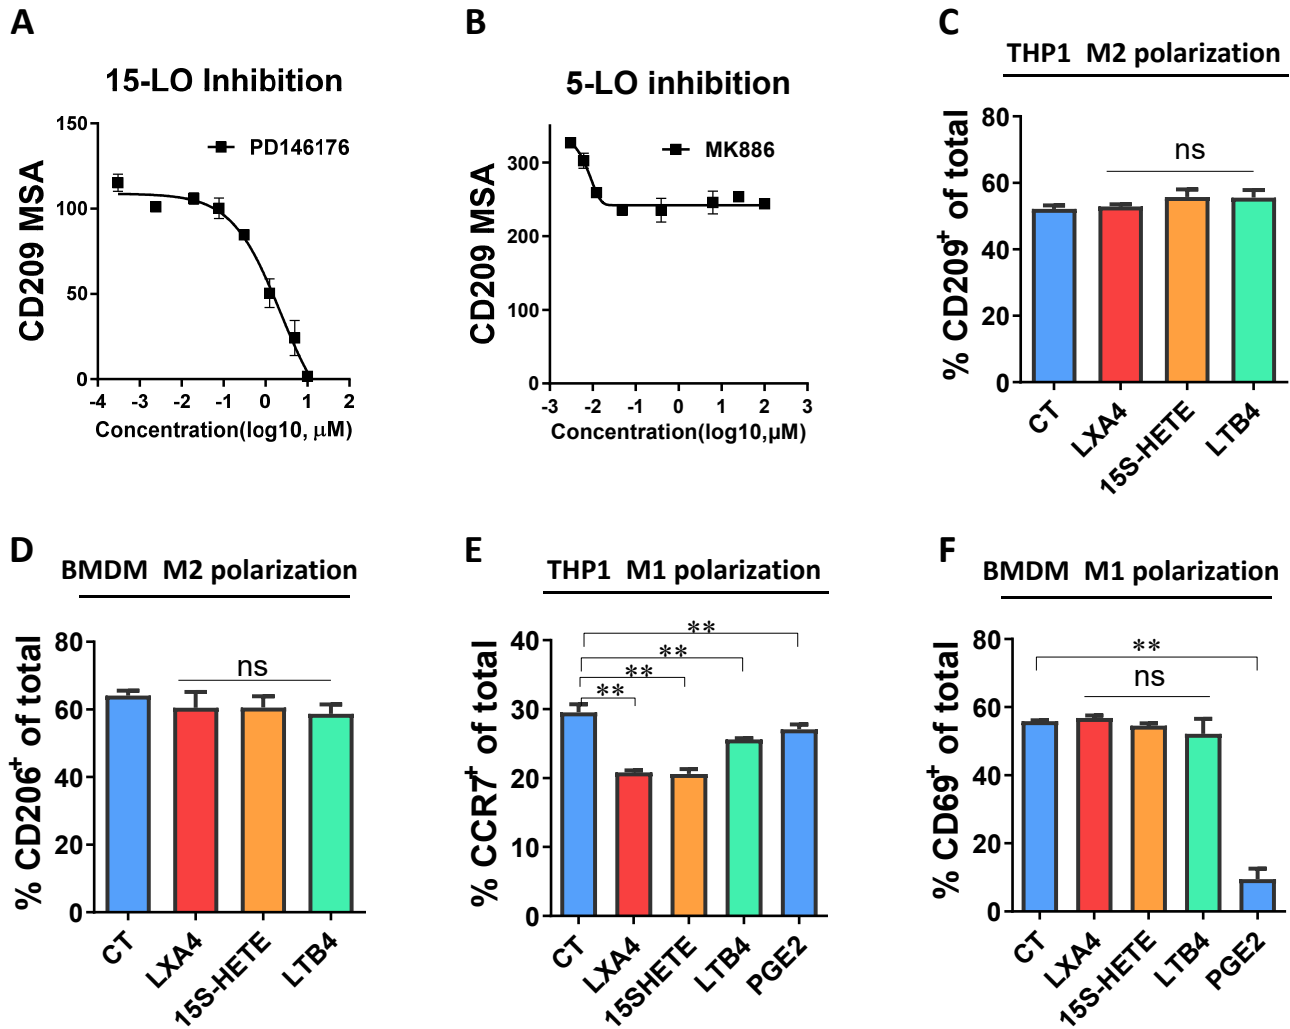

**Supplementary Figure S5.** Arachidonic acid metabolic enzymes and metabolites regulated macrophages polarization. **(A and B)** Dose response curves for 15-lipoxygenase (15-LO) or 5-lipoxygenase (5-LO) in M2 polarization. **(C and D)** CD209 or CD206 expression in THP-1 or BMDM model. Cells were treated with LXA4 (50 ng/mL), 15S-HETE (50 ng/mL) or LTB4 (100 nM) during M2 polarization. **(E and F)** CCR7 or CD69 expression in THP-1 or BMDM model. Cells were treated with LXA4 (50 ng/mL), 15S-HETE (50 ng/mL), LTB4 (100 nM), PGE2 (2  $\mu$ M) during M1 polarization. All data represent mean  $\pm$  S.D. (n=3). \*P < 0.05; \*\* P < 0.01; ns, no significance

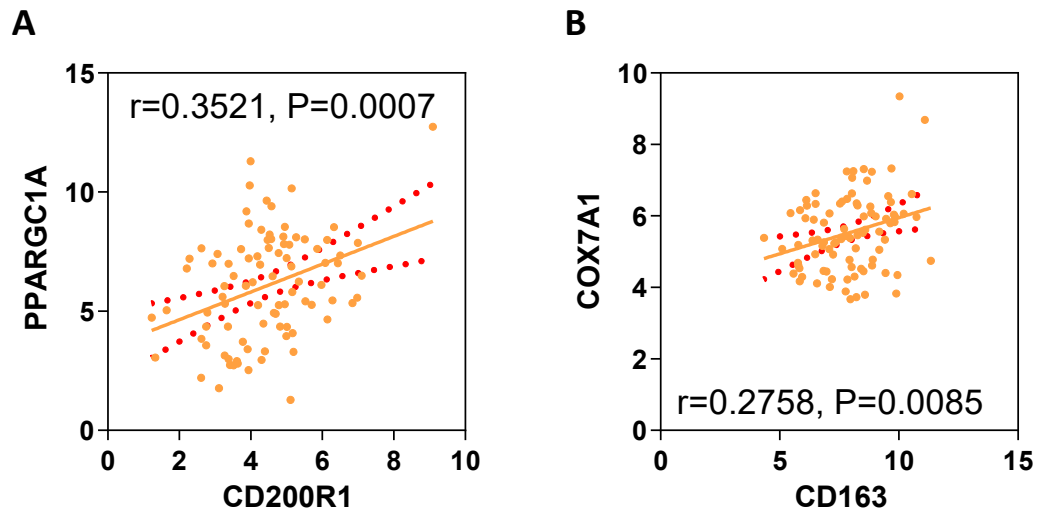

**Supplementary Figure S6.** Oxidative phosphorylation correlates to M2 TAM in ESCC. **(A and B)** Correlation analysis of oxidative phosphorylation (PPARGC1A, COX7A1) and M2 macrophages (CD200R1, CD163) in human ESCC from TCGA database.

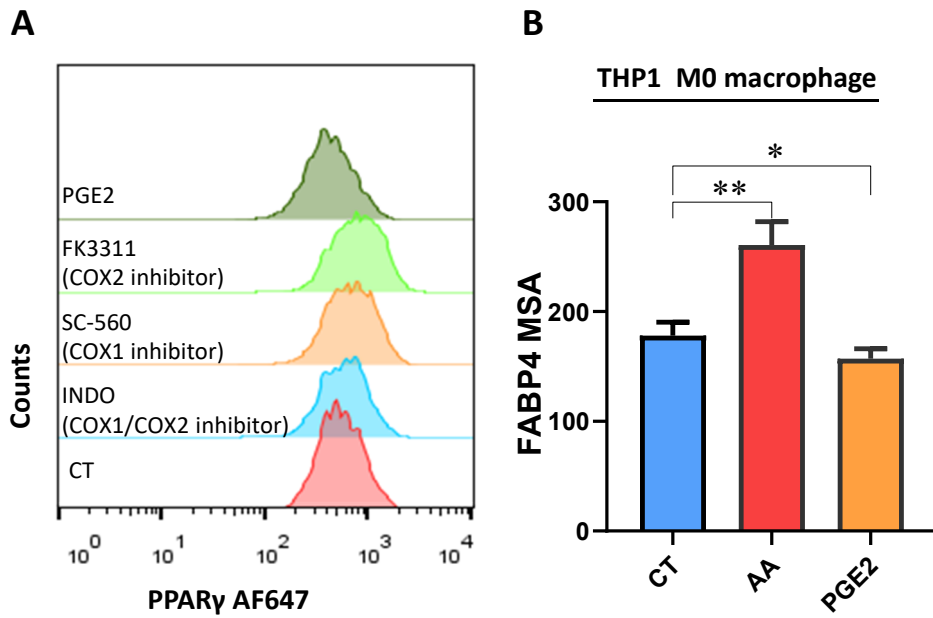

**Supplementary Figure S7.** Expression and transcription activity of PPAR $\gamma$  were inhibited by PGE2 treatment. **(A)** Representative fluorescence histogram of macrophages PPAR $\gamma$  from flow cytometry with treatments as indicated. **(B)** Expression of macrophages FABP4 (indicator for PPAR $\gamma$  transcription activity) with treatment as indicated. M0 macrophages were treated with PGE2 (2  $\mu$ M), FK3311 (10  $\mu$ M), SC-560 (10  $\mu$ M), Indomethacin (10  $\mu$ M), AA (50  $\mu$ M). All data represent mean  $\pm$  S.D. (n=3). \*P < 0.05; \*\* P < 0.01.

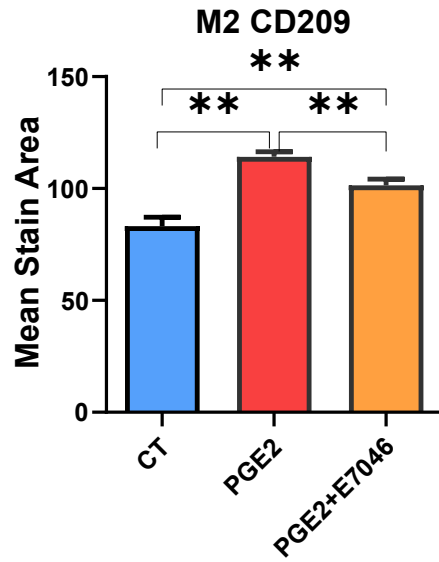

**Supplementary Figure S8.** Blockade of EP4 did not abolish PGE2-promoted M2 polarization. THP-1 derived macrophages were treated with PGE2 (2  $\mu$ M) with/without E7046 (10  $\mu$ M) during M2 polarization. All data represent mean  $\pm$  S.D. (n=3). \*P < 0.05; \*\* P < 0.01.



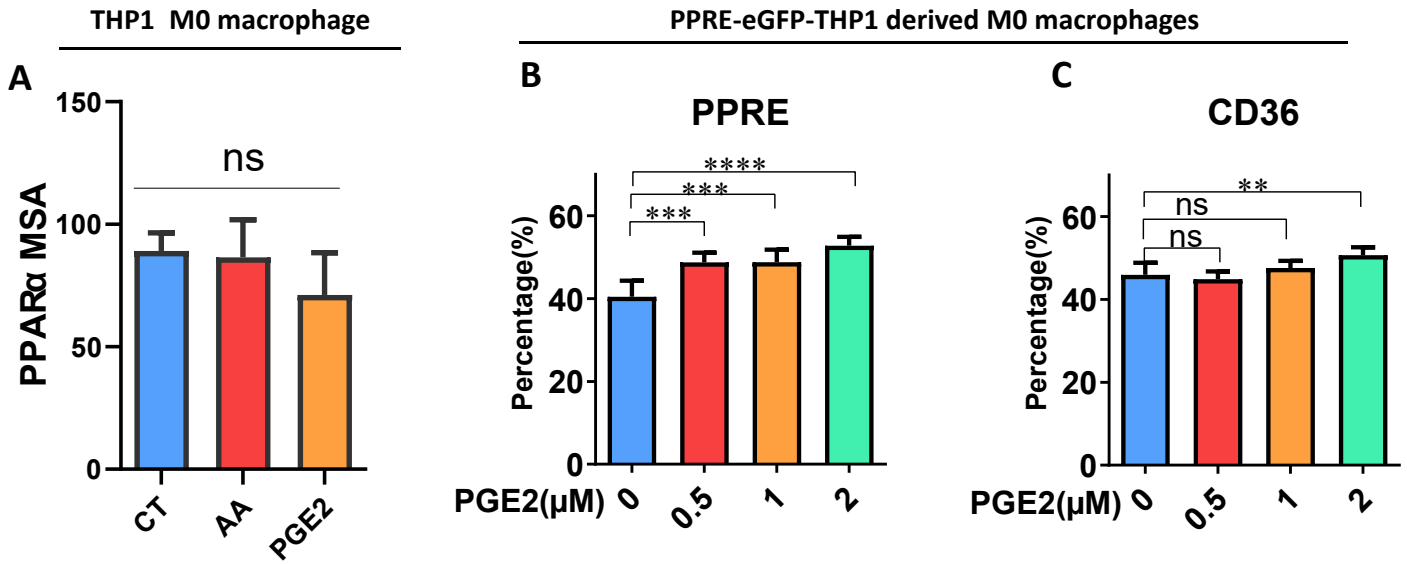

**Supplementary Figure S9.** The involvement of PPARs in AA/PGE2 mediated M2 polarization. **(A)** Protein expression of PPAR $\alpha$  in macrophages treated with AA (50  $\mu$ M) or PGE2 (2  $\mu$ M) for 48 h. **(B and C)** PPRE activation (B) and CD36 expression (C) in macrophages treated as indicated for 48 h. All data represent mean  $\pm$  S.D. (n=3). \*P < 0.05; \*\* P < 0.01; ns, no significance.

**Table S1 Key resources**

| <b>REAGENTS<br/>RESOURCES</b>             | <b>OR</b> | <b>SOURCE</b>                    | <b>IDENTIFIER</b> |
|-------------------------------------------|-----------|----------------------------------|-------------------|
| <b>Biological material</b>                |           |                                  |                   |
| THP-1                                     |           | American Type Culture Collection | TIB-202           |
| Bone marrow derived monocytes (wild type) |           | C57BL/6 mice                     | /                 |
| Bone marrow derived monocytes (PPARG KO)  |           | Jackson Labs                     | /                 |
| <b>Chemicals, Antibodies, cytokines</b>   |           |                                  |                   |
| Anti-CCR7                                 |           | Biologend                        | Cat#353204        |
| Anti-CD209                                |           | Biologend                        | 330106;330104     |
| Anti-CD206                                |           | Biologend                        | 141706            |
| Anti-CD69                                 |           | Biologend                        | 104518            |
| Arachidonic acid (AA)                     |           | Sigma Aldrich                    | A3611             |
| ATP5A                                     |           | Abcam                            | ab14748           |
| BMS309403 (BMS)                           |           | MedChemExpress                   | HY-101903         |
| CPT1A                                     |           | Proteintech                      | 15184-1-AP        |
| Etomoxir sodium salt (ETO)                |           | MedChemExpress                   | HY-50202A         |
| FASN-IN-4 tosylate (FAI)                  |           | MedChemExpress                   | HY-12648A         |
| FABP4 PE                                  |           | LSBio                            | LS-C650165        |
| Human Trustain FcX                        |           | Biologend                        | 422302            |
| Fatostatin (FATO)                         |           | MedChemExpress                   | HY-14452          |
| FK 3311                                   |           | MedChemExpress                   | HY-14445          |
| FT113 (FT)                                |           | MedChemExpress                   | HY-111551         |
| Human IL-4                                |           | Peptotech                        | 200-04            |
| Human IL-13                               |           | Peptotech                        | AF-200-13         |
| Human IFN $\gamma$                        |           | Peptotech                        | 300-02            |
| IACS-10759 (IA)                           |           | Selleck                          | S8731             |
| Indomethacin (INDO)                       |           | MedChemExpress                   | HY-14397          |
| JZL184                                    |           | MedChemExpress                   | HY-15249          |
| Lipopolysaccharides (LPS)                 |           | Sigma Aldrich                    | L6529             |
| Murine M-CSF                              |           | Peptotech                        | 315-02            |
| Murine IL-4                               |           | Peptotech                        | 214-14            |
| Murine IL-13                              |           | Peptotech                        | 210-13            |
| Murine IFN $\gamma$                       |           | Peptotech                        | 315-05            |
| 3-Nitropropionic acid (NP)                |           | Selleck                          | S3652             |
| PPAR $\gamma$                             |           | Cell signaling technology        | 2435S             |
| Prostaglandin E2 (PGE2)                   |           | Sigma Aldrich                    | P0409             |
| Phorbol 12-myristate 13-acetate (PMA)     |           | Sigma Aldrich                    | P8139             |

|                                                  |                   |                                                                                                                   |
|--------------------------------------------------|-------------------|-------------------------------------------------------------------------------------------------------------------|
| Sulfosuccinimidyl oleate(SSO)                    | Sigma Aldrich     | SML2148                                                                                                           |
| Trimetazidine (TD)                               | MedChemExpress    | HY-B0968A                                                                                                         |
| VLX600 (VLX)                                     | MedChemExpress    | HY-12406                                                                                                          |
| <b>Critical Commercial assays</b>                |                   |                                                                                                                   |
| Foxp3 / Transcription Factor Staining Buffer Set | Invitrogen        | 00-5523-00                                                                                                        |
| LEGENDplex Human Macrophage/Microglia Panel      | biolegend         | 740502                                                                                                            |
| RNeasy Mini Kit                                  | QIAGEN            | 74104                                                                                                             |
| <b>Deposited Data</b>                            |                   |                                                                                                                   |
| RNA-sequencing data                              | This paper        | GSE159112, GSE159120; GSE134067                                                                                   |
| <b>Software and Algorithms</b>                   |                   |                                                                                                                   |
| Gene Set Enrichment Analysis (GSEA) (v4.0.3)     | [2]               | <a href="http://software.broadinstitute.org/gsea/index.jsp">http://software.broadinstitute.org/gsea/index.jsp</a> |
| Metabolite Set Enrichment Analysis (MSEA)(v4.0)  | [3]               | <a href="https://www.metaboanalyst.ca/">https://www.metaboanalyst.ca/</a>                                         |
| Joint Pathway analysis                           | [3]               | <a href="https://www.metaboanalyst.ca/">https://www.metaboanalyst.ca/</a>                                         |
| GraphPad prism (v 6.01)                          | GraphPad Software | N/A                                                                                                               |
| ImageXpress                                      | Molecular Device  |                                                                                                                   |
| <b>Other</b>                                     |                   |                                                                                                                   |
| DMEM                                             | Gibco             | 11995065                                                                                                          |
| Fetal Bovine Serum (FBS)                         | Gibco             | 10099141C                                                                                                         |
| Fixation and Permeabilization Solution           | BD Bioscience     | 554722                                                                                                            |
| FluoroBrite™ DMEM                                | Gibco             | A1896702                                                                                                          |
| Hoechst 33342                                    | Solarbio          | C0031                                                                                                             |
| penicillin-streptomycin                          | Gibco             | 15140122                                                                                                          |
| Perm/Wash                                        | BD Bioscience     | 554723                                                                                                            |
| RPMI 1640 (ATCC modification)                    | Gibco             | A1049101                                                                                                          |
| 2-mercaptoethanol                                | Sigma Aldrich     | M3148                                                                                                             |

**Supplementary Table S2**

Arachidonic acid metabolism associated metabolites from lipidomics analysis

| <b>Mode</b> | <b>Ratio</b> | <b>Label</b>     | <b>Description</b>                                                                                                                                        |
|-------------|--------------|------------------|-----------------------------------------------------------------------------------------------------------------------------------------------------------|
| negative    | 4.06         | 6.58_397.2261m/z | Prostaglandins(PGH2;PGE2;PGD2;PGI2);TXA2;Lipoxin A4;Lipoxin B4;20-hydroxy-LTB4;15-keto-PGF2alpha                                                          |
| positive    | 2.82         | 0.96_372.2761m/z | 11beta-PGF2;15-F2t-IsoP;PGF2alpha;11,12,15-THETA;Trioxilin A3;11,14,15-THETA                                                                              |
| positive    | 2            | 1.43_586.3112m/z | LTF4                                                                                                                                                      |
| negative    | 1.76         | 3.04_411.2041m/z | 20-carboxy-LTB4                                                                                                                                           |
| positive    | 1.29         | 3.05_327.2306m/z | Arachidonic acid                                                                                                                                          |
| positive    | 0.78         | 1.12_338.2474n   | 5,6-DHET;8,9-DiHETrE;11,12-DiHETrE;14,15-DiHETrE                                                                                                          |
| positive    | 0.75         | 0.76_334.2349m/z | 15-Deoxy-d-12,14-PGJ2                                                                                                                                     |
| positive    | 0.72         | 1.13_317.2101m/z | 12-oxo-LTB4;PGA2;PGB2;PGC2;PGJ2;delta-12-PGJ2;5,6-Ep-15S-HETE                                                                                             |
| positive    | 0.65         | 2.87_336.2517m/z | LTA4;15-KETE;5-KETE;12-KETE                                                                                                                               |
| negative    | 0.41         | 0.68_355.2036m/z | 15S-HETE;5S-HETE;20-HETE;19S-HETE;5,6-EET;(+/-)8,9-EpETrE;(+/-)11,12-EpETrE;(+/-)14,15-EpETrE;8S-HETE;12S-HETE;16R-HETE;9S-HETE;11R-HETE;12R-HETE;8R-HETE |

**Supplementary Table S3**

Detail information for top 20 GSEA enrichment pathways in PGE2 treated M2 polarization.

| NAME                                                                                                            | SIZE | ES       | NES      | NOM p    | FDR q-   |
|-----------------------------------------------------------------------------------------------------------------|------|----------|----------|----------|----------|
| STAPHYLOCOCCUS_AUREUS_INFECTION_-<br>_HOMO_SAPIENS_(HUMAN)(HSA05150)                                            | 301  | 0.66548  | 1.40566  | 0        | 0.738042 |
| ANTIGEN_PROCESSING_AND_PRESENTATION_-<br>_HOMO_SAPIENS_(HUMAN)(HSA04612)                                        | 211  | 0.722176 | 1.392314 | 0        | 0.570246 |
| IL-17_SIGNALING_PATHWAY_-<br>_HOMO_SAPIENS_(HUMAN)(HSA04657)                                                    | 140  | 0.510845 | 1.376146 | 0        | 0.489651 |
| PHAGOSOME_-_HOMO_SAPIENS_(HUMAN)(HSA04145)                                                                      | 453  | 0.509968 | 1.357369 | 0        | 0.465207 |
| OSTEOCLAST_DIFFERENTIATION_-<br>_HOMO_SAPIENS_(HUMAN)(HSA04380)                                                 | 191  | 0.461932 | 1.343462 | 0        | 0.443978 |
| HEMATOPOIETIC_CELL_LINEAGE_-<br>_HOMO_SAPIENS_(HUMAN)(HSA04640)                                                 | 199  | 0.655428 | 1.341753 | 0        | 0.386636 |
| TH17_CELL_DIFFERENTIATION_-<br>_HOMO_SAPIENS_(HUMAN)(HSA04659)                                                  | 166  | 0.533104 | 1.338639 | 0        | 0.338688 |
| GLYCOSAMINOGLYCAN_BIOSYNTHESIS_-<br>_CHONDROITIN_SULFATE/_DERMATAN_SULFATE_-<br>_HOMO_SAPIENS_(HUMAN)(HSA00532) | 28   | 0.601301 | 1.332624 | 0.181818 | 0.317932 |
| TUBERCULOSIS_-<br>_HOMO_SAPIENS_(HUMAN)(HSA05152)                                                               | 398  | 0.540087 | 1.332295 | 0        | 0.288273 |
| LEISHMANIASIS_-<br>_HOMO_SAPIENS_(HUMAN)(HSA05140)                                                              | 242  | 0.591083 | 1.328794 | 0        | 0.267774 |
| OXIDATIVE_PHOSPHORYLATION_-<br>_HOMO_SAPIENS_(HUMAN)(HSA00190)                                                  | 861  | 0.543396 | 1.32836  | 0        | 0.248068 |
| INFLAMMATORY_BOWEL_DISEASE_-<br>_HOMO_SAPIENS_(HUMAN)(HSA05321)                                                 | 100  | 0.584769 | 1.326967 | 0        | 0.231645 |
| VARIOUS_TYPES_OF_N-GLYCAN_BIOSYNTHESIS_-<br>_HOMO_SAPIENS_(HUMAN)(HSA00513)                                     | 66   | 0.573851 | 1.310889 | 0        | 0.240281 |
| GRAFT-VERSUS-HOST_DISEASE_-<br>_HOMO_SAPIENS_(HUMAN)(HSA05332)                                                  | 99   | 0.752296 | 1.30874  | 0        | 0.226761 |
| TYPE_I_DIABETES_MELLITUS_-<br>_HOMO_SAPIENS_(HUMAN)(HSA04940)                                                   | 123  | 0.665351 | 1.305426 | 0        | 0.230762 |
| NON-ALCOHOLIC_FATTY_LIVER_DISEASE_-<br>_HOMO_SAPIENS_(HUMAN)(HSA04932)                                          | 626  | 0.494478 | 1.305105 | 0        | 0.219527 |
| TYROSINE_METABOLISM_-<br>_HOMO_SAPIENS_(HUMAN)(HSA00350)                                                        | 67   | 0.48297  | 1.299975 | 0        | 0.227472 |
| VIRAL_MYOCARDITIS_-<br>_HOMO_SAPIENS_(HUMAN)(HSA05416)                                                          | 276  | 0.578541 | 1.298735 | 0        | 0.217668 |
| ESTROGEN_SIGNALING_PATHWAY_-<br>_HOMO_SAPIENS_(HUMAN)(HSA04915)                                                 | 322  | 0.459586 | 1.290178 | 0        | 0.222081 |
| RHEUMATOID_ARTHRITIS_-<br>_HOMO_SAPIENS_(HUMAN)(HSA05323)                                                       | 209  | 0.583726 | 1.287354 | 0        | 0.217427 |
